# Supplementary material
Source: Research Square preprint supplement (doi:10.21203/rs.3.rs-9440495/v1)

# Uncropped western blots

**Fig. 3B**

**CD44**

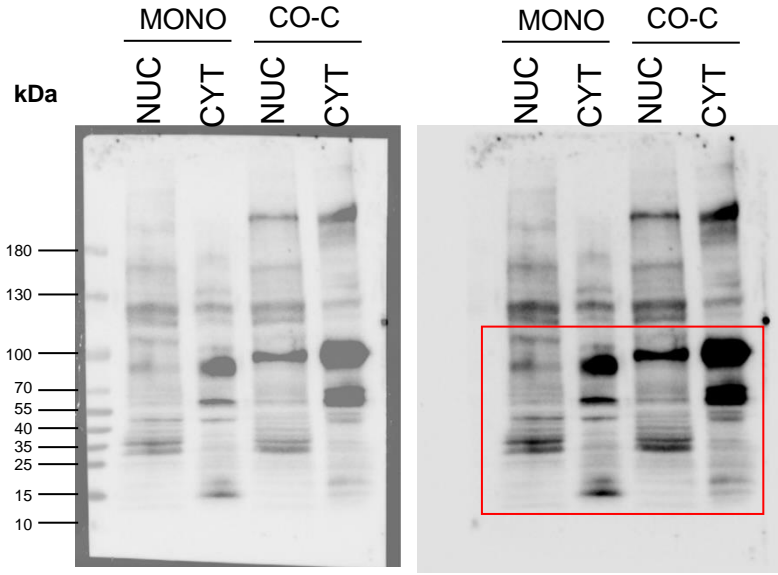

**GFP**

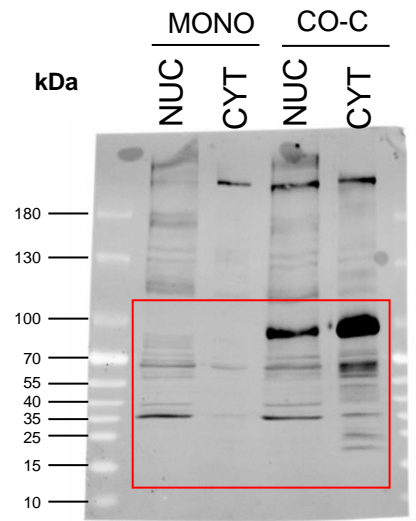

**tubulin**

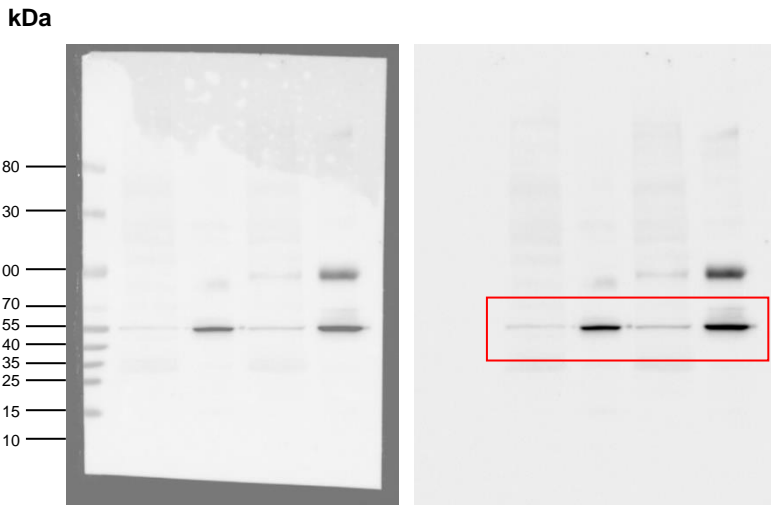

**lamin B1**

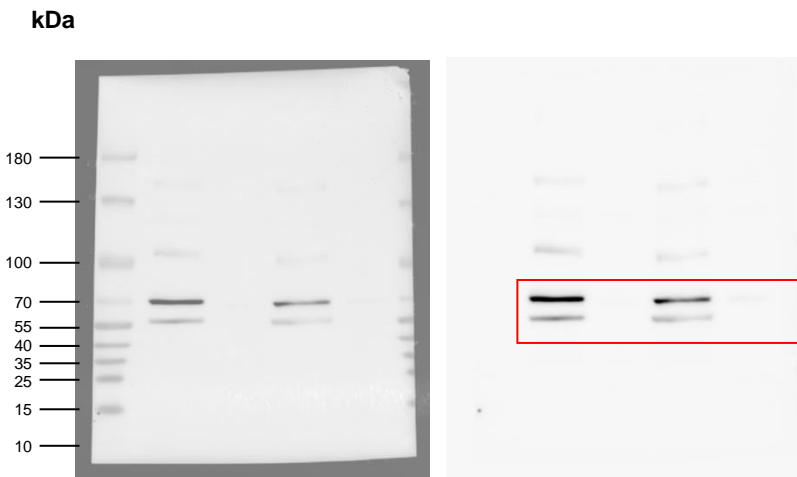

**Fig. 5D**

**P-ERK1/2**

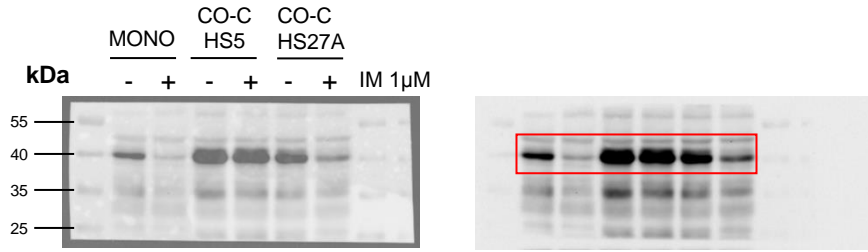

**ERK1/2**

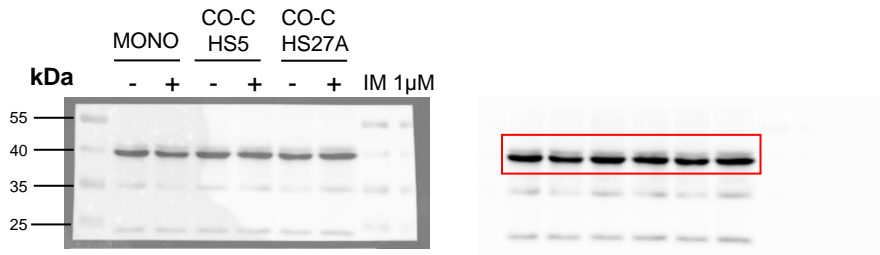

**P-JNK**

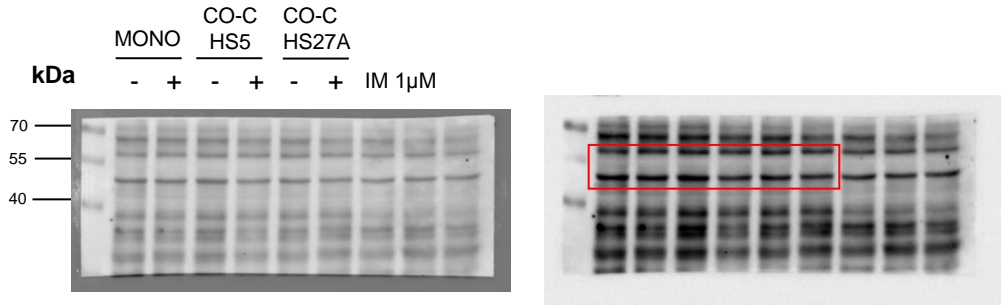

**HIF-1 $\alpha$**

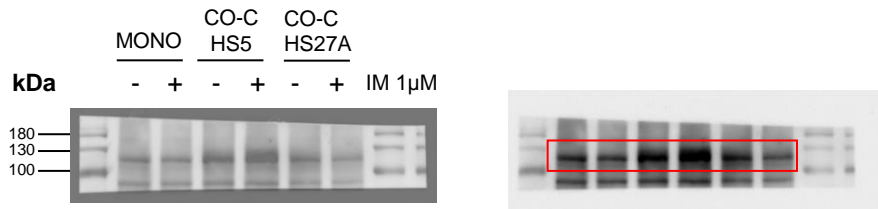

**I $\kappa$ B $\alpha$**

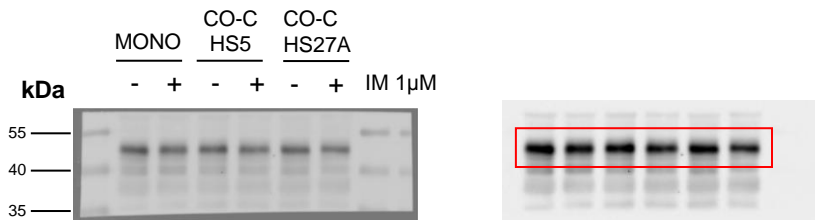

**tubulin**

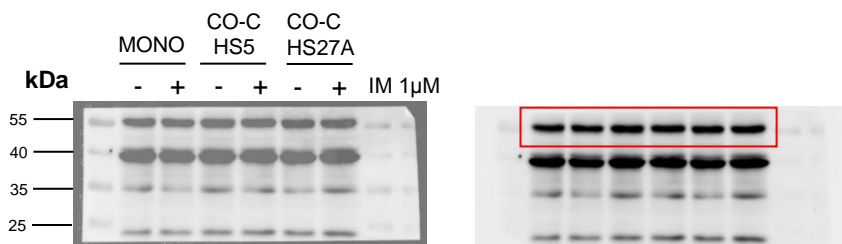

**Fig. 6E**

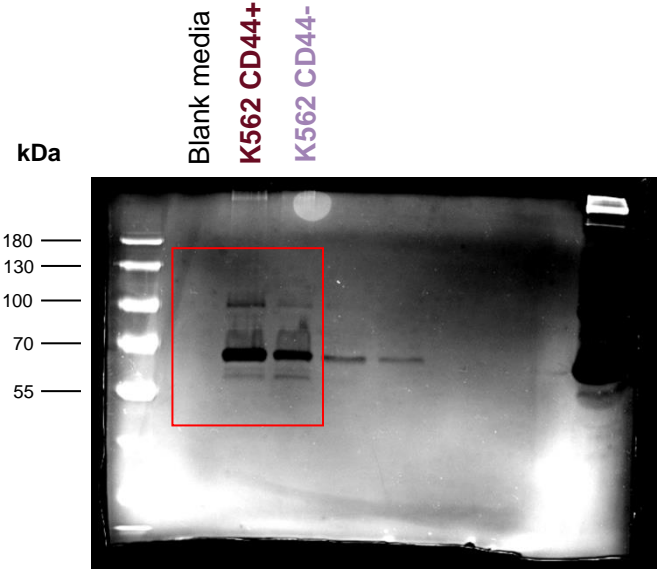

**Fig. S3A**

**CD44**

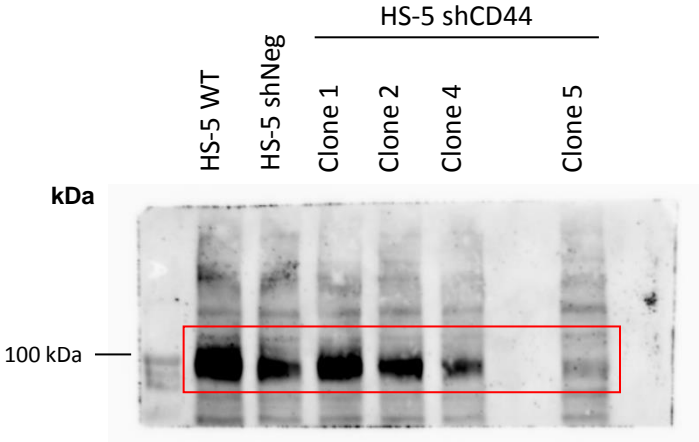

**tubulin**

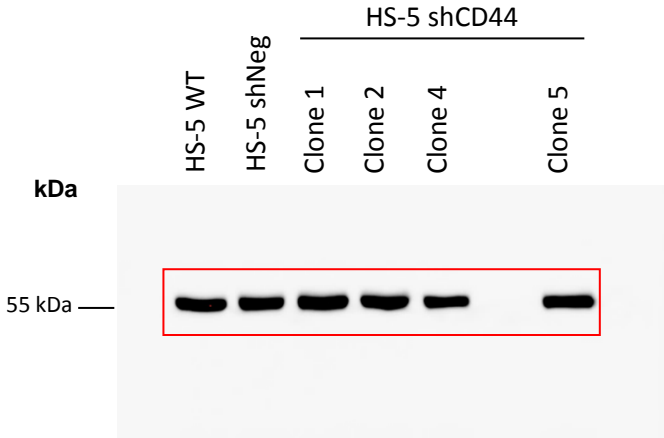

**Fig. S5A**

**P-  
STAT3**

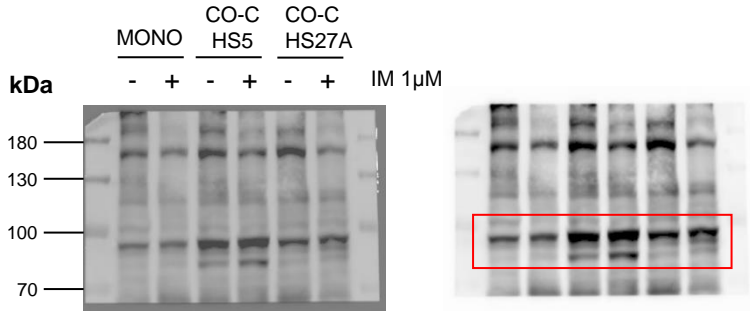

**STAT  
3**

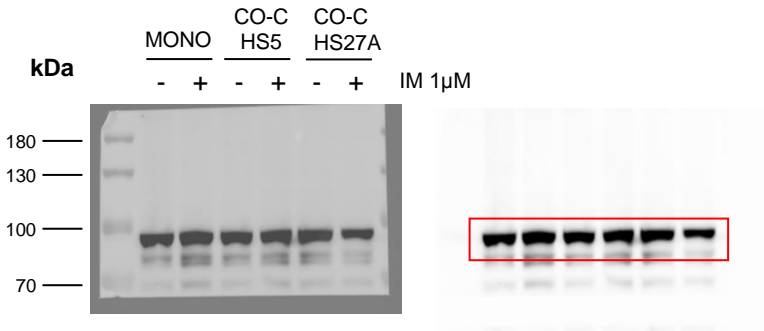

**tubulin**

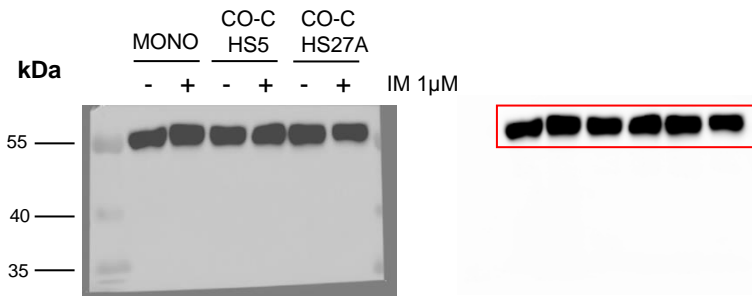

Supplement: Supplementary file 4 [file 6e6bcf08bcef820888cac5fd.pdf]
