# Supplementary material
Source: Research Square preprint supplement (doi:10.21203/rs.3.rs-9440495/v1)
Supplement: Supplementary file 1 [file 1fbeabbce5f94fd175e3d69f.xlsx]

## Sheet: UPregulated
Supplementary Data S1. Upregulated and downregulated genes from Venn diagram comparisons
CD44+ VS MONO	CD44- VS MONO	CD44+ VS CD44-	CD44+ vs MONO and CD44- vs MONO	CD44+ vs MONO and CD44+ vs CD44-	CD44- vs MONO and CD44+ vs CD44-	CD44+ vs MONO and CD44- vs MONO and CD44+ vs CD44-
SPSB1	WASH9P	LAPTM5	WASH9P	KIRREL1	KIRREL1	KIRREL1
DHRS3	EPHA2	CDCA8	EPHA2	PLXNA2	CCN1	CCN1
WASH9P	PTPRU	KIRREL1	PTPRU	CCN1	EPAS1	EPAS1
SERINC2	MIR34AHG	PLXNA2	MIR34AHG	MXRA8	PID1	PID1
FBLIM1	CNN3	CCN1	CNN3	VWA1	LRRC15	LRRC15
SYTL1	S1PR1	MXRA8	S1PR1	FNDC10	TRANK1	TRANK1
EPHA2	PGM1	VWA1	PGM1	ACOT11	GPX1	GPX1
ARHGEF19	F3	FNDC10	F3	PIK3CD	MGLL	MGLL
GPR153	EPS15-AS1	SH3BGRL3	EPS15-AS1	EPAS1	TGFBI	TGFBI
MAP3K6	TRIM45	ACOT11	LAMC1	PID1	BASP1	BASP1
PTPRU	LAMC1	PIK3CD	SH2D1B	FN1	SERPINE1	SERPINE1
CASZ1	SH2D1B	PIK3C2B	KIRREL1	OTOF	COL1A2	COL1A2
DNALI1	KIRREL1	EPAS1	PRRX1	EMILIN1	TNC	TNC
IFFO2	PRRX1	ADD2	SLC45A3	LRRC15	TSPAN18	TSPAN18
MIR34AHG	SLC45A3	INPP5D	PTPN14	TRANK1	CD248	CD248
CTNNBIP1	PTPN14	FEV	PINK1	DAG1	MMP3	MMP3
MORN1	PINK1	PID1	THBS3	GPX1	CD44	CD44
RIMS3	THBS3	FN1	SYT11	MGLL	CKAP4	CKAP4
RAB3B	SYT11	OTOF	IGSF3	TGFBI	MMP2	MMP2
CPT2	IGSF3	EMILIN1	BTBD19	BASP1	MVP	MVP
CNN3	BTBD19	TNS1	CCN1	SH3PXD2B	ITGA3	ITGA3
S1PR1	CCN1	GNAI2	TLR5	TTYH3	SLC16A3	SLC16A3
PGM1	TLR5	LRRC15	INSRR	SERPINE1	MYO1F	MYO1F
F3	INSRR	TRANK1	DMBX1	CLIP2	C3	C3
EPS15-AS1	DMBX1	DAG1	HSPA6	CHST12	ANGPTL4	ANGPTL4
SLC6A17	HSPA6	PPM1M	FCGR2A	COL1A2	LIF	LIF
VANGL1	FCGR2A	GPX1	TINAGL1	WAS	COL6A2	COL6A2
AQP10	TINAGL1	MGLL	ECM1	TNC	COL6A1	COL6A1
LAMC1	ECM1	TGFBI	RCAN3	SPTAN1
RCSD1	RCAN3	BASP1	JUN	TSPAN18
QSOX1	JUN	SH3PXD2B	TMEM234	C11orf21
SH2D1B	TMEM234	LCP2	IL6R	CD248
KIRREL1	IL6R	SLC29A1	PLA2G2C	MMP3
DUSP10	PLA2G2C	GMPR	IFI6	CD44
EDARADD	IFI6	TTYH3	LINC02593	PLAU
TOR3A	LINC02593	SERPINE1	SAMD11	SNCG
PRRX1	SAMD11	SSPOP	SUSD4	PRF1
NID1	SUSD4	SRRM3	NTRK1	CKAP4
BTG2	NTRK1	CLIP2	NFASC	LRP1
SLC45A3	NFASC	CHST12	CSF3R	PTPN6
PTPN14	CSF3R	ELMO1	ACKR1	SELPLG
SLAMF6P1	ACKR1	COL1A2	MTMR11	ADCY6
PLXNA2	MTMR11	WAS	TUFT1	RIN3
LAMB3	TUFT1	DPYSL2	COL16A1	DLK1
KIAA0040	COL16A1	FGFR1	COLEC11	GPR132
COLGALT2	COLEC11	RHOBTB2	EPAS1	ANPEP
CNIH3	CYP1B1	TNC	EPCAM-DT	MMP2
RNVU1-31	EPAS1	SPTAN1	SEMA4F	MT2A
FAM43B	RNF103	SEMA4D	IL1B	RABEP2
PINK1	YPEL5	INCENP	CRIM1	CORO1A
EFNA1	EPCAM-DT	TSPAN18	NPAS2	ITGAM
THBS3	SEMA4F	C11orf21	DNER	VPS9D1
GBA	IL1B	CD248	CNRIP1	MVP
FAM89A	CRIM1	LGALS12	HECW2	APOBR
SYT11	NPAS2	SPI1	TANC1	FKBP10
IGSF3	DNER	MMP3	SH3BP4	ITGA3
TAGLN2	CEP68	CD44	ACKR3	LIMD2
H6PD	CFAP221	PWWP2B	IL1A	SLC16A3
MIIP	CNRIP1	PLAU	FAM178B	SMOX
KIAA1522	HECW2	DUSP5	MYO1B	EPB41L1
TMEM54	TANC1	VSIR	COL3A1	MYO1F
ADAMTS4	SH3BP4	SNCG	PTPRN	RASGRP4
COL9A2	ACKR3	PRF1	CCL20	CD22
MPZ	IL1A	CKAP4	PID1	C3
TMEM53	EPHA4	LRP1	SERPINE2	SIGLEC6
RNU5D-1	FAM178B	ADGRD1	DPP4	ANGPTL4
PLK3	MYO1B	PTPN6	INHA	TYROBP
BTBD19	COL3A1	SELPLG	RHOB	HOMER3
THEMIS2	PROKR1	ADCY6	CCDC74A	ARHGEF18
MFAP2	PTPRN	RIN3	NRP2	SIGLEC10
CCN1	CCL20	TNFAIP2	ANTXR1	LIF
TLR5	PID1	DLK1	RNF144A	INPP5J
INSRR	SERPINE2	GPR132	SEMA4C	COL6A2
DMBX1	TTC30A	CSPG4	LOXL3	SLC37A1
CREB3L4	DPP4	RPP25	RND3	ITGB2
HSPA6	SNORA80B	ANPEP	CMPK2	COL6A1
FCGR2A	INHA	MMP2	DNAJB2	DOP1B
MXRA8	RHOB	MT2A	ARMC9
VWA1	CCDC74A	RABEP2	DES
FNDC10	NRP2	CORO1A	TRIB2
IL24	DOCK10	OSGIN1	RABL2A
TINAGL1	ANTXR1	ITGAM	GPAT2
ECM1	RSAD2	PLK1	RBMS1
RCAN3	RNF144A	VPS9D1	PXDN
JUN	SEMA4C	MVP	MLPH
TMEM234	LOXL3	APOBR	CAPG
ATP8B2	RND3	HASPIN	WASH2P
IL6R	CMPK2	FKBP10	RFTN1
PLA2G2C	DNAJB2	ITGA3	ENTPD3
KIF17	ARMC9	TRAPPC1	FBLN2
ACOT11	DES	AURKB	HEG1
IFI6	TRIB2	LIMD2	TGFBR2
PTGS2	RABL2A	SLC16A3	FSTL1
LINC02593	GPAT2	PHLPP1	TNFSF10
PLEKHN1	RBMS1	FAM110A	PLOD2
ISG15	FAP	SMOX	KLHL6
SSBP3	PXDN	RGS19	HES1
IQGAP3	MLPH	SIRPA	LINC02026
BCAN-AS1	CAPG	EPB41L1	CLDN11
NES	ITGA6	GNA15	ABI3BP
CRABP2	ODC1-DT	MYO1F	LRRC15
SH2D2A	WASH2P	RASGRP4	BHLHE40
SAMD11	NIFK-AS1	CD22	TRANK1
SUSD4	EFHB	C3	LRIG1
KIF21B	RFTN1	SIGLEC6	CCDC80
LEFTY2	ENTPD3	ANGPTL4	WNT5A
NTRK1	FBLN2	TYROBP	AMOTL2
PDPN	ALCAM	HOMER3	GPX1
OLFML2B	HEG1	ARHGEF18	ACKR2
S100A10	TGFBR2	SIGLEC10	ZBTB47
NFASC	FSTL1	LIF	COL7A1
MIR6859-1	TNFSF10	INPP5J	BHLHE40-AS1
IKBKE	SKIL	IL17REL	ITGB5
RASSF5	PLOD2	COL6A2	FILIP1L
CROCC	VEPH1	SLC37A1	ABTB1
ZNF362	KLHL24	ITGB2	MGLL
S100A16	KLHL6	COL6A1	PIGZ
S100A13	HES1	DOP1B	UBA7
S100A1	LINC02026		MST1R
CSF3R	CLDN11		LINC00885
ACKR1	ABI3BP		LINC02038
ELF3	LRRC15		EVC
PEAR1	BHLHE40		UCHL1
PBXIP1	TRANK1		CXCL8
MTMR11	LRIG1		RHOH
S100A11	CCDC80		TBC1D9
UBXN11	WNT5A		VEGFC
TUFT1	AMOTL2		MIR3945HG
PIK3CD	GPX1		HTRA3
COL16A1	ACKR2		AFAP1
PHLDA3	ZBTB47		CXCL1
LINC00623	COL7A1		CXCL5
PRKCZ	BHLHE40-AS1		MYO10
RNF187	ITGB5		FST
AGTRAP	KALRN		VCAN
MTHFR	FILIP1L		GDNF
KCNAB2	ABTB1		TGFBI
PPM1J	MGLL		RGMB
LINC01137	PIGZ		BASP1
COLEC11	UBA7		DPYSL3
TP53I3	MST1R		ADAMTS2
ANXA4	LINC00885		FBN2
EIF3FP3	LINC02038		ALDH7A1
EVA1A	EVC		SEPTIN8
EPAS1	UCHL1		PDLIM7
PKDCC	CXCL8		ADAM19
GALNT14	RHOH		VTRNA1-3
EPCAM-DT	PCDH10		SPARC
SEMA4F	TBC1D9		LOX
IL1B	VEGFC		SLC22A4
CRIM1	MIR3945HG		COL23A1
NPAS2	HTRA3		ARSI
DNER	AFAP1		EGR1
SEPTIN10	DDX60L		LINC02863
CNRIP1	CXCL1		IRF1
HECW2	CXCL5		SMIM3
TWIST2	MYO10		STC2
TANC1	FST		HLA-A
SH3BP4	VCAN		MRAP2
BOK	GDNF		BACH2
ACKR3	CMYA5		CD24
IL1A	TGFBI		MARCKS
MARCHF4	RGMB		SLC2A12
FAM178B	BASP1		AGPAT4
MYO1B	DPYSL3		KLC4
RTKN	ADAMTS2		TMEM200A
COL3A1	FBN2		HLA-B
ESPNL	ALDH7A1		SLC22A23
ARHGEF4	SEPTIN8		COL12A1
PTPRN	PDLIM7		THBS2
CCDC74B	ADAM19		CCN2
CCL20	VTRNA1-3		RXRB
GLI2	REEP5		SGK1
PID1	SPARC		NT5E
SERPINE2	LOX		TSPAN13
IL1RL1	SLC22A4		UPP1
DPP4	COL23A1		TFPI2
SPEG	ARSI		SERPINE1
OBSL1	EGR1		GNG11
INHA	LINC02863		EPDR1
SLC4A3	IRF1		GAL3ST4
SDC1	SMIM3		GPC2
RHOB	STC2		GPNMB
CCDC74A	HLA-A		ASIC3
NRP2	MYLIP		CDK5
FN1	MRAP2		SMARCD3
BCL2L11	BACH2		ZBED6CL
OTOF	CD24		LRRC61
ANTXR1	GJA1		SCRN1
RNF144A	MARCKS		CAV1
SEMA4C	OGFRL1		INHBA
LOXL3	SLC2A12		ABCB8
PAX8	AGPAT4		IL6
LYPD6	KLC4		AQP1
RND3	TMEM200A		IGFBP3
CMPK2	SYNJ2		EGFR
HOXD8	HLA-B		ACTR3C
HAGLR	SLC22A23		COL1A2
DNAJB2	COL12A1		ATG9B
KIF3C	BTN3A1		TMEM184A
ARMC9	THBS2		SLC9A7
COL6A3	CCN2		PIR
DES	RXRB		IDS
GMPPA	SGK1		CXXC1P1
TRIB2	NT5E		ABCD1
DYSF	ICA1		BMX
RABL2A	TSPAN13		BGN
MOGS	UPP1		PORCN
GPAT2	TFPI2		ARSD
RBMS1	SERPINE1		PLS3
EFHD1	GNG11		IL9R
PXDN	EPDR1		DNASE1L1
MLPH	GAL3ST4		STC1
MAPRE3	GPC2		DOCK5
EMILIN1	GPNMB		LOXL2
ACTR1B	ASIC3		SH2D4A
SLC11A1	CDK5		NRG1
CAPG	SMARCD3		ADGRA2
KLHL29	ZBED6CL		LAPTM4B
WASH2P	LRRC61		SNAI2
SUSD5	SCRN1		RHPN1
LMCD1	CAV1		LY6K
RFTN1	INHBA		HAS2
ENTPD3	ABCB8		SNORD13
FBLN2	IL6		ENPP2
C3orf18	AQP1		MAPK15
PTPRG	IGFBP3		PLAT
NT5DC2	EGFR		MSC
TMEM158	ACTR3C		GSDMD
STAB1	COL1A2		IDO2
HEG1	ATG9B		TNFRSF10D
CDCP1	TMEM184A		S1PR3
TGFBR2	SYTL5		COL27A1
FSTL1	SLC9A7		KLF4
PRICKLE2	PIR		FOXE1
ARHGAP31	ARHGEF6		TNC
TM4SF1	IDS		COL5A1
TNFSF10	IL13RA1		PAPPA
PLOD2	CXXC1P1		GSN
KLHL6	ABCD1		CDKN2A
HES1	BMX		FAM214B
LINC02026	BGN		GBGT1
MB21D2	PORCN		WASHC1
ARIH2OS	ARSD		LINC00963
DALRD3	PLS3		BSPRY
CLDN11	IL9R		HDHD3
ABI3BP	DNASE1L1		ALAD
CAMK2N2	STC1		LPAR1
LRRC15	DOCK5		AQP3
BHLHE40	LOXL2		MIR181A2HG
TRANK1	SH2D4A		CAVIN3
LRIG1	NRG1		TSPAN18
CISH	ADGRA2		SPDYC
CCDC80	LAPTM4B		YAP1
DAG1	SNAI2		PRSS23
PRRT3	RHPN1		CLMP
WNT5A	LY6K		ETS1
LAMB2	HAS2		GLB1L2
AMOTL2	SNORD13		ADM
GPX1	ENPP2		CD248
RAB43	MAPK15		IL10RA
ACKR2	PLAT		TMPRSS4
ZBTB47	MSC		PARVA
NAA80	GSDMD		POLD4
PLXNB1	IDO2		ST3GAL4
CELSR3	TNFRSF10D		KIAA1549L
COL7A1	VPS13B-DT		MMP1
BHLHE40-AS1	S1PR3		TMEM132A
CSPG5	COL27A1		B3GNT6
IL17RC	KLF4		MMP3
ITGB5	FOXE1		NTM
FLNB	TNC		DKK3
FILIP1L	COL5A1		SLC25A45
EFCAB12	PAPPA		TMEM25
ABTB1	GSN		CD44
MGLL	CDKN2A		NAV2
MYLK	FAM214B		DENND2B
PIGZ	GBGT1		THY1
UBA7	WASHC1		AKR1E2
MST1R	LINC00963		NRP1
LINC00885	BSPRY		LINC00863
LINC02038	HDHD3		MYOF
FAM86JP	ALAD		RHOBTB1
CCR5AS	LPAR1		CYP26A1
RNF212	AQP3		WBP1L
EVC	MIR181A2HG		HTRA1
MXD4	CAVIN3		GRK5
IDUA	TSPAN18		KCNMA1
SH3BP2	SPDYC		DOCK1
FAM86EP	YAP1		IFIT1
UCHL1	PRSS23		IFIT3
DGKQ	CLMP		PAPSS2
CCDC96	ETS1		PDZD7
CXCL8	GLB1L2		ADAM12
PRSS12	CCDC88B		SGPL1
RHOH	MRGPRE		SFXN3
TBC1D9	ADM		AKR1C2
PALLD	CD248		VIM
VEGFC	IL10RA		WASH8P
PDGFC	TMPRSS4		PCED1B
ANKRD37	PARVA		IGFBP6
TMEM129	POLD4		PLXNC1
MIR3945HG	ST3GAL4		CKAP4
HTRA3	KIAA1549L		SSH1
AFAP1	MMP1		C12orf75
ANXA3	TMEM132A		PTHLH
WFS1	B3GNT6		EMP1
MAN2B2	MMP3		HMGA2
CXCL1	NTM		PTPRB
CXCL5	DKK3		AMIGO2
MYO10	SLC25A45		OAS3
FST	TMEM25		TCTN1
VCAN	CD44		TUBA1A
GDNF	NAV2		SDSL
CSF2	DENND2B		PHLDA1
TGFBI	THY1		ERBB3
RGMB	AKR1E2		GPRC5A
BASP1	NRP1		KRT8
DPYSL3	LINC00863		ART4
ADAMTS2	MYOF		CRYL1
ANXA6	PIK3AP1		TSC22D1
CXXC5	RHOBTB1		COL4A1
SH3PXD2B	CYP26A1		FOXA1
ARHGAP26	WBP1L		FERMT2
GFPT2	HTRA1		FOS
ARAP3	GRK5		LTBP2
FBN2	RNA5SP304		CLBA1
ALDH7A1	KCNMA1		AHNAK2
SYNPO	DOCK1		DEGS2
SIL1	IFIT1		ZC2HC1C
SEPTIN8	IFIT3		FRMD6
PCYOX1L	PAPSS2		ARHGEF40
SPOCK1	PDZD7		ZNF219
CCDC69	ADAM12		MEG3
B4GALT7	SGPL1		ADSS1
PDLIM7	SFXN3		DACT1
SLIT3	AKR1C2		C14orf132
ADAM19	VIM		FAM177A1
VTRNA1-3	WASH8P		MMP14
TMCO6	PCED1B		DPF3
WWC1	IGFBP6		VASH1
ABLIM3	GOLGA2P5		PRKCH
SPARC	PLXNC1		LINC01629
LOX	CKAP4		BMF
SHROOM1	SSH1		THBS1
PCDH1	C12orf75		SMAD6
PDLIM4	PTHLH		CA12
SLC22A4	EMP1		LOXL1
P4HA2	DNAI7		ALDH1A3
COL23A1	KIF5A		WASH3P
ARSI	HMGA2		FBN1
EGR1	PTPRB		GREM1
LINC02863	AMIGO2		RASGRP1
IRF1	OAS3		NHLRC4
ENC1	TCTN1		WFIKKN1
SMIM3	TUBA1A		RAB26
STC2	SDSL		TMC7
PLK2	PHLDA1		GPRC5B
PCDHGC3	ERBB3		MMP2
DOCK2	GPRC5A		C16orf86
REEP2	KRT8		CCDC189
GPX3	ART4		PIGQ
TRIO	CD69		TNFRSF12A
SPRY4-AS1	PRANCR		ROGDI
SOX4	CRYL1		PLLP
HLA-A	TSC22D1		PARD6A
LEMD2	LINC01049		ITPRIPL2
MRAP2	COL4A1		ACSM3
BACH2	NUS1P2		ACSM1
CD24	LINC00431		IL32
MOXD1	MBNL2		MVP
MARCKS	FOXA1		RAP1GAP2
TREML2	FERMT2		ENO3
MICAL1	FOS		SP6
SLC2A12	LTBP2		ABCC3
AGPAT4	CLBA1		ITGA3
PXDC1	AHNAK2		SPATA20
KLC4	DEGS2		ITGB3
PTK7	ZC2HC1C		CSF3
CUL9	FRMD6		HS3ST3A1
TMEM200A	ARHGEF40		ST6GALNAC1
AIF1	ZNF219		ITGB4
MAPK13	MEG3		RAB34
HLA-B	ADSS1		CYB561
GPSM3	DACT1		ACE
FLOT1	C14orf132		OSBPL7
SLC22A23	FAM177A1		SCRN2
COL12A1	MMP14		SLC16A5
ZNF76	DPF3		SLC16A3
RSPH3	VASH1		COL1A1
THBS2	PRKCH		FDXR
CCN2	LINC01588		CORO6
TAP1	LINC01629		SLFN11
RXRB	BMF		KRT13
SGK1	THBS1		KRT15
NT5E	TEX9		KRT19
TAPBP	SMAD6		LGALS3BP
CUL7	CA12		C1QTNF1
PRSS16	LOXL1		TIMP2
FAM20C	ALDH1A3		FBF1
TTYH3	TM6SF1		COLEC12
IQCE	WASH3P		ACAA2
TSPAN13	FBN1		SERPINB2
GSDME	GREM1		CCBE1
TNS3	RASGRP1		PTPRM
AMPH	NHLRC4		EPB41L3
COBL	WFIKKN1		PRELID3A
UPP1	RAB26		SMAD7
NPTX2	TMC7		LAMA1
TFPI2	IQCK		DLGAP1-AS1
SERPINE1	GPRC5B		DLGAP1-AS2
PEG10	MMP2		APCDD1L
TECPR1	GDE1		DNMT3B
GNG11	C16orf86		PROCR
EPDR1	CCDC189		KCNG1
SGCE	PIGQ		TLE6
PODXL	TNFRSF12A		MYO1F
FAM180A	ROGDI		SYDE1
GAL3ST4	PLLP		TSHZ3
GPC2	PARD6A		CYP2T1P
GPNMB	ITPRIPL2		HAMP
CCM2	ACSM3		PSG4
NOS3	REXO5		FOSB
ASIC3	ACSM1		TNNI3
CDK5	IL32		DNAAF3-AS1
ST7-AS1	MVP		C3
SSC4D	CCDC113		LRRC4B
FSCN1	RAP1GAP2		IL11
SMARCD3	ENO3		SBK3
ZBED6CL	SP6		SHFL
LRRC61	ABCC3		CYP2S1
SCRN1	ITGA3		AXL
AEBP1	SPATA20		ANGPTL4
CAV1	SSH2		CNN1
CLIP2	U3		RRAS
CARD11	ITGB3		JUNB
INHBA	CSF3		HOOK2
TRBC2	HS3ST3A1		SPACA6
EPHB6	ST6GALNAC1		PPP1R14A
PCOLCE	ITGB4		APOC1
SLC4A2	RAB34		SYCE2
GLI3	CYB561		KLC3
ABCB8	ACE		PPP1R13L
IL6	OSBPL7		OLFM2
CHST12	SCRN2		RAB3D
AQP1	SLC16A5		RPS4Y1
STAG3	SLC16A3		LIF
IGFBP3	SLFN5		FBLN1
KCNH2	COL1A1		DENND6B
EGFR	FDXR		KDELR3
CASTOR2	CORO6		NPTXR
TNRC18	SLFN11		APOBEC3G
REPIN1	KRT13		MGAT3
ACTR3C	KRT15		HMOX1
CCL26	KRT19		EMID1
RHBDD2	LGALS3BP		APOL4
COL1A2	C1QTNF1		H1-0
CCDC71L	TIMP2		APOL6
PRSS2	FBF1		APOL2
WIPF3	COLEC12		APOL1
KRBA1	ACAA2		APP
ATG9B	SERPINB2		COL6A2
ORAI2	CCBE1		SIM2
TMEM184A	TGIF1		ADAMTS1
SRPX	PTPRM		COL6A1
SLC9A7	EPB41L3
PIR	PRELID3A
FGD1	SMAD7
WAS	LAMA1
BEX1	DLGAP1-AS1
BEX3	DLGAP1-AS2
IDS	APCDD1L
LDOC1	DNMT3B
SYN1	PROCR
ELK1	KCNG1
CXXC1P1	TLE6
PNCK	MYO1F
ABCD1	SYDE1
ARHGAP4	TSHZ3
PLP2	CYP2T1P
BMX	HAMP
FLNA	PSG4
WASH6P	FOSB
TCEAL3	TNNI3
BGN	DNAAF3-AS1
PORCN	C3
ARSD	LRRC4B
ZBED1	IL11
GABRQ	SBK3
CD99L2	SHFL
ELF4	CYP2S1
PLS3	AXL
IL9R	ANGPTL4
GATA1	CNN1
HDAC6	RRAS
ARMCX2	JUNB
DNASE1L1	HOOK2
WWC3	SPACA6
STC1	PPP1R14A
DOCK5	APOC1
SCARA3	SYCE2
NKX3-1	KLC3
LOXL2	PPP1R13L
EPHX2	OLFM2
SH2D4A	RAB3D
NRG1	RPS4Y1
ADGRA2	LIF
SOX17	FBLN1
KRT8P3	DENND6B
LAPTM4B	KDELR3
SNAI2	NPTXR
RHPN1	APOBEC3G
RHPN1-AS1	MGAT3
KHDRBS3	HMOX1
LY6K	EMID1
TRIB1	APOL4
HAS2	H1-0
SNORD13	APOL6
CHRNA6	APOL2
SCX	APOL1
FBXL6	APP
LINC01300	COL6A2
NDRG1	SIM2
HGSNAT	ADAMTS1
ENPP2	COL6A1
MAPK15
PARP10
SHARPIN
CTSB
PLEKHA2
PLAT
NUDT18
BMP1
PHYHIP
MSC
GSDMD
MROH6
IDO2
TNFRSF10D
MFSD3
DOK2
FAM83A
SHC3
ANGPTL2
S1PR3
NINJ1
TLE1
COL27A1
KLF4
FOXE1
TNC
RGS3
FNBP1
COL5A1
PTGES
BRD3OS
PAPPA
NIBAN2
SWI5
LINC00475
ARHGEF39
TPM2
C8G
PTGDS
NPDC1
MAN1B1-DT
ZNF462
ABL1
IER5L
CARD9
OLFM1
LAMC3
ENG
PIP5KL1
PLPP7
GSN
CDKN2A
FAM214B
GBGT1
SPACA9
WASHC1
SPTAN1
ZER1
CRAT
LINC00963
ASTN2
NOXA1
DNAJB5
MAN1B1
MYORG
PTGR1
NCS1
ASS1
WDR31
BSPRY
HDHD3
ALAD
PTGS1
DAB2IP
LPAR1
CERCAM
AQP3
CRB2
MIR181A2HG
ACP2
PTGDR2
CAVIN3
ABTB2
TSPAN18
SPDYC
LRP5
YAP1
ARHGEF17
PRSS23
SIAE
CLMP
ETS1
ROBO3
GLB1L2
CD82
SERPINH1
MAP4K2
CD151
CRYAB
DDB2
C11orf21
RCN1
C11orf49
SLC22A18
ADM
MTRNR2L8
LARGE2
DRAP1
CATSPER1
CD248
RIN1
B4GAT1
IL10RA
TMPRSS4
MRGPRF
TPCN2
LMNTD2
PARVA
POLD4
TMEM134
ST3GAL4
TRPT1
ZDHHC24
UBE2L6
SERPING1
KIAA1549L
MMP1
TMEM132A
PKP3
DCHS1
TSKU
B3GNT6
TKFC
NLRX1
MCAM
ZBTB16
CCS
CDKN1C
SPTBN2
MMP3
NTM
DKK3
SLC25A45
TMEM25
SIPA1
LTBP3
GRAMD1B
EPS8L2
PHLDB1
INPPL1
CD44
NAV2
LAYN
DENND2B
THY1
GSEC
AKR1E2
MSRB2
NRP1
ZNF503
DKK1
JMJD1C-AS1
UNC5B
LINC00863
MYOF
MARVELD1
FRAT1
UBTD1
DPCD
FBXW4
RHOBTB1
CYP26A1
WBP1L
CHST15
LHPP
HTRA1
GRK5
CUEDC2
PLAU
KCNMA1
DOCK1
IFIT1
ZCCHC24
IFIT3
PAPSS2
SEMA4G
PDZD7
IFIT2
ADAM8
SNCG
ACSL5
ADAM12
PRF1
SGPL1
SFXN3
CALHM2
ALOX5
AKR1C2
SVIL
VIM
VIM-AS1
WASH8P
PRICKLE1
PCED1B
HOXC-AS2
HOXC4
RBMS2
SRGAP1
ITGA5
IGFBP6
GALNT6
NAV3
DUSP6
ALDH2
FMNL3
PLXNC1
CKAP4
LRP1
HOXC12
NCKAP1L
SSH1
STAC3
GLI1
ARHGEF25
AGAP2-AS1
RBP5
C12orf75
RHEBL1
P3H3
C12orf57
PTPN6
MMP19
PTMS
HSPB8
PTHLH
TNFRSF1A
EMP1
TPCN1
SELPLG
ACVRL1
TAPBPL
HMGA2
PTPRB
AMIGO2
SPSB2
OAS3
TCTN2
TCTN1
TUBA1A
SDSL
SLC8B1
STAT2
CACNB3
ADCY6
AACS
IRAK3
NUAK1
PHLDA1
LMBR1L
ERBB3
GPRC5A
NINJ2
MAP3K12
IQCD
KRT8
ART4
ACADS
ABCB9
P2RX4
ACACB
RNU4-2
RNU4-1
LINC00942
PCED1B-AS1
CRYL1
TSC22D1
COL4A2
COL4A1
GAS6
DZIP1
FOXA1
FERMT2
FOS
LTBP2
JDP2
TECPR2
LGMN
CLBA1
AHNAK2
GPR68
DEGS2
RIN3
RN7SL1
LRP10
AJUBA
EFS
DHRS4
PGF
ZC2HC1C
FRMD6
PAPLN
RNASE6
RNASE1
ARHGEF40
ZNF219
ZBTB42
DLK1
MEG3
PCK2
PSME1
DHRS1
ADSS1
DACT1
PLEK2
NYNRIN
C14orf132
BDKRB2
FOXN3
FAM177A1
MMP14
FBLN5
SALL2
LGALS3
HHIPL1
GSTZ1
BTBD6
DPF3
IFI27L2
GPR132
PACS2
VASH1
IRF2BPL
NID2
PRKCH
IFI27
PNMA1
LINC01220
LINC01629
BMF
THBS1
CHAC1
SMAD6
CORO2B
CA12
MYO1E
PLCB2
PPCDC
SEMA7A
C15orf39
LOXL1
SCAMP5
CEMIP
GPR176
LARP6
PIF1
ALDH1A3
CKMT1B
SLC24A1
AVEN
TRIM69
CD276
ANPEP
ARPIN
ITPKA
GNB5
MFGE8
BNC1
WASH3P
FBN1
IDH2
SPINT1
GREM1
TLNRD1
DISP2
RASGRP1
ZNF609
THSD4
TLN2
SEMA4B
CCDC9B
FLYWCH2
NHLRC4
WFIKKN1
FAM234A
RAB26
WDR24
IFT140
TMC7
SNX29
IL4R
GPRC5B
QPRT
GPT2
JMJD8
MMP2
DOK4
KIFC3
ENKD1
IRX3
C16orf86
CYBA
ADGRG5
COTL1
PSMB10
CCDC189
ORAI3
PRSS8
PYCARD
MT2A
MT1E
RABEP2
CD19
YPEL3
CORO1A
PIGQ
TNFRSF12A
ROGDI
ITGAM
ITGAX
RUSF1
SPSB3
HAGH
VPS9D1
CTF1
GAS8
PLLP
B3GNT9
BAIAP3
CMTM3
PARD6A
TSNAXIP1
ZNF688
ITPRIPL2
ACSM3
ACSM1
DECR2
CES3
DNASE1
IL32
MVP
APOBR
TMEM231
ZNF747
SULT1A1
CD2BP2-DT
CDH13
RAP1GAP2
ENO3
ATP2A3
GRB7
FKBP10
PNMT
P3H4
TNS4
IGFBP4
LGALS9
ABI3
SP6
ABCC3
ITGA3
SPATA20
TBC1D16
TOB1-AS1
LRRC45
GIP
FZD2
CEP131
SLC38A10
FAAP100
ITGB3
IFI35
CYB5D2
CSF3
CHRNB1
TMEM107
NTN1
HS3ST3A1
ST6GALNAC1
RHBDF2
ACAP1
TSPAN10
ITGB4
TRIM47
CUEDC1
ACSF2
TOM1L2
RAB34
HIC1
CYB561
ACE
LIMD2
OSBPL7
SCRN2
PECAM1
MILR1
ACBD4
SLC16A5
PLD2
HSD17B1
RETREG3
ERBB2
SLC16A3
G6PC3
MAFG-DT
ACTG1
LLGL2
GALK1
ABR
PDK2
COL1A1
TMEM92
GRN
FAM171A2
ITGA2B
FLOT2
FDXR
USH1G
CLDN7
ABHD15
TP53I13
HDAC5
CORO6
SLFN11
KRT13
KRT15
KRT19
MGC16275
LGALS3BP
C1QTNF1
RAB11FIP4
ARHGAP27
TRPV2
HSPB9
LLGL1
TIMP2
RNF213
MLLT6
MYO15B
FBF1
KSR1
SNHG25
COLEC12
ACAA2
SERPINB2
CCBE1
PTPRM
ZNF532
NFATC1
EPB41L3
PRELID3A
CABLES1
SMAD7
OSBPL1A
LAMA1
FHOD3
TXNDC2
NDUFV2-AS1
DLGAP1-AS1
COSMOC
DLGAP1-AS2
SMOX
ADA
TOX2
TGM2
APCDD1L
EDEM2
SLC17A9
MAP1LC3A
PMEPA1
CDH4
TCEA2
GATA5
HELZ2
DNMT3B
PROCR
MYL9
SNX21
PLTP
LPIN3
UBE2C
NTSR1
EPB41L1
RIN2
KCNG1
CD40
CBFA2T2
SPAG4
LINC00659
ARID3A
TLE6
PALM
VAV1
ZFR2
BTBD2
PLIN3
MYO1F
TLE2
ADGRE5
SYDE1
GIPC1
TPM4
OCEL1
PBX4
TSHZ3
SLC27A1
DMKN
RINL
LRP3
PVR
CYP2T1P
CYP2F2P
ECH1
BCL3
HAMP
MAP3K10
C5AR2
MAG
PSG4
FBXO27
HRC
NPAS1
TRPM4
FOSB
RTN2
RASGRP4
CD37
CD22
TNNI3
RELB
DNAAF3-AS1
ITPKC
EML2-AS1
PLD3
TNFSF9
C3
LRRC4B
SYT3
PKN1
KLF2
PRX
PLEKHA4
NUCB1
NUCB1-AS1
IL11
SBK3
GAMT
PCSK4
COL5A3
SHFL
CYP2S1
AXL
SIGLEC8
SIGLEC12
SIGLEC6
FPR3
PLPPR3
TRAPPC6A
CERS4
ANGPTL4
CCDC159
RGL3
ZNF653
CNN1
RRAS
TSKS
LRG1
TNFAIP8L1
PEX11G
PNPLA6
MAN2B1
JUNB
DNASE2
HOOK2
SHKBP1
NUMBL
COQ8B
PGLS
APLP1
TYROBP
IL27RA
ASF1B
HOMER3
SEMA6B
PRSS57
SPACA6
HSH2D
EXOC3L2
MAP4K1
IER2
GRAMD1A
PPP1R14A
ARHGEF18
MARCHF2
RTBDN
TGFBR3L
GFY
NECTIN2
APOE
APOC1
SYCE2
FZR1
KLC3
PPP1R13L
SCN1B
OLFM2
SIGLEC10
VMAC
KLF1
ZNF446
STXBP2
SIX5
CLEC11A
IGFL2-AS1
ATP8B3
RAB3D
ZSWIM4
ANKRD24
EVI5L
KCNN1
ZNF541
NFILZ
SIGLEC14
SIGLEC17P
RPS4Y1
DDX3Y
IL17RA
RIMBP3
MMP11
LIF
FBLN1
TRIOBP
DENND6B
RTL6
LGALS1
INPP5J
KDELR3
OGFRP1
NPTXR
APOBEC3G
MGAT3
CELSR1
CSDC2
PMM1
HMOX1
C22orf23
PICK1
CCDC116
EMID1
NIPSNAP1
RNF215
PLXNB2
BCR
GGT5
APOL4
LMF2
H1-0
MYH9
APOL6
APOL2
APOL1
SELENOM
SCARF2
ADM2
CDPF1
RN7SKP80
SUN2
P2RX6
CBY1
APP
COL6A2
SIM2
COL18A1
ADAMTS1
BACE2
SLC37A1
ITGB2
PTTG1IP
COL6A1
DOP1B
LINC01547

## Sheet: DOWNregulated
Supplementary Data S1. Upregulated and downregulated genes from Venn diagram comparisons
CD44+ VS MONO	CD44- VS MONO	CD44+ VS CD44-	CD44+ vs MONO and CD44- vs MONO	CD44+ vs MONO and CD44+ vs CD44-	CD44- vs MONO and CD44+ vs CD44-	CD44+ vs MONO and CD44- vs MONO and CD44+ vs CD44-
CLCN6	TMEM51	SCIN	CLCN6	SCIN	SCIN	SCIN
KAZN-AS1	CLCN6	CCT6P3	KAZN-AS1	CCT6P3
PCSK9	KAZN-AS1	CA1	PCSK9	CA1
FOXJ3	SCMH1	LINC02193	MPC2	LINC02193
LRP8	PCSK9	NDUFV2	ID3
TENT5C	DHCR24	RAD21L1	GLUL
MPC2	MPC2		MRPL20-DT
LHX4	GALNT2		RHD
TP53BP2	ID3		SNORD99
KCNK1	GLUL		ESPN
ID3	SLC2A1		H2BC21
KHDC4	MRPL20-DT		LBH
GLUL	SLC6A9		KLF11
SLC30A10	IBA57		SATB2-AS1
ERMAP	RHD		TM4SF19
MRPL20-DT	SNORD99		TFDP2
SDE2	ESPN		KLHDC8B
H2BC20P	H2BC21		SLC6A6
TARDBP	RHCE		SLC6A19
RSRP1	TAL1		ANKRD33B
RHD	LBH		FAXDC2
SNORD99	ADD2		SLC29A1
STX6	INPP5D		CNKSR3
ESPN	FEV		ACAT2
H2BC21	MFSD2B		H2AC6
PIK3R3	KLF11		H4C8
NBAS	TET3		H3C10
LBH	SLC20A1		TNFAIP3
RNF149	SATB2-AS1		H2BC5
PPP1R21-DT	SIAH2		H2BC11
CDCA7	TM4SF19		PHACTR1
LPIN1	TFDP2		SCIN
KLF11	KLHDC8B		INSIG1
BMP10	KCNAB1		RELN
ZNF512	RPP14		VGF
MAT2A	SLC6A6		CA8
IL18RAP	SLC6A19		SQLE
SATB2-AS1	ANKRD33B		PTP4A3
TMPPE	PITX1		B3GAT1-DT
CPOX	FAXDC2		B3GAT1
DBR1	SLC29A1		HBBP1
TM4SF19	PIM1		SLC43A3
TFDP2	CNKSR3		LINC00958
KLHDC8B	CITED2		SLCO2B1
SEC22C	ACAT2		MIR202HG
SLC6A6	BEND3		BNIP3
EMC3-AS1	GPANK1		BTG1
ITPR1-DT	IGF2R		MVK
SLIT2	H2AC6		MYO16
CISD2	H4C8		ZFYVE21
TMEM192	H3C10		ESR2
RN7SKP30	TNFAIP3		NR2F2
MED28	PLAGL1		PDP2
SLC6A19	H2BC5		HBA2
MIR4458HG	H2BC11		PLD6
ANKRD33B	PHACTR1		ICAM2
HMGCS1	SCIN		PCYT2
SLC36A1	CRCP		ANKRD27
MIR1244-2	INSIG1		FUT1
SNHG4	MIR25		PRR5
FAXDC2	RELN		PLA2G3
PDCD6	VGF		CSF2RB
SLC29A1	AMER1		UBASH3A
ME1	TBL1X		LSS
MDN1	GAGE13		MT-TP
LHFPL5	PIM2
CNKSR3	MFHAS1
SNORA33	CA8
LINC01011	SQLE
ACAT2	INTS9
FKBP5	PTP4A3
H2AC6	NR6A1
H4C8	FXN
H3C10	TRMO
TNFAIP3	WT1
H2AC13	FTH1
H2BC5	CHKA
H2BC11	FEZ1
PHACTR1	B3GAT1-DT
SCIN	B3GAT1
MTURN	DGAT2
CD36	HBBP1
SND1-IT1	PHLDA2
STRIP2	FOSL1
INSIG1	RAB3IL1
RBM28	SLC43A3
RELN	LGALS12
CCT6P3	LINC00958
VGF	SLCO2B1
SNHG26	DHCR7
PRKX	H19
SCML2	HMX3
ZNF674-AS1	PWWP2B
UPRT	DUSP5
MSL3	AIFM2
SYTL4	VSIR
SLC25A37	MIR202HG
CA8	BNIP3
PIP4P2	BTG1
RDH10	NAB2
SQLE	MVK
AGO2	SCARB1
CA1	ERP29
PTP4A3	MYO16
TMEM70	CHAMP1
TEX10	ZFYVE21
PALM2AKAP2	GPHN
MOB3B	ESR2
PRXL2C	FNTB
OSTCP8	MAX
MIRLET7A1HG	SYNE3
STX3	JAG2
B3GAT1-DT	MAN2A2
B3GAT1	NR2F2
HBBP1	RPP25
SLC43A3	MVD
LINC00958	PDP2
PRDM10	MT1F
NCR3LG1	FUS
FUT4	HBA2
SLCO2B1	OSGIN1
PCF11-AS1	KIAA0513
ATP5MG	HASPIN
NEAT1	CDK5R1
ERLIN1	FAM83G
NT5C2	HOXB8
MXI1	FAM117A
MIR202HG	PLD6
BNIP3	THRA
BTG1	SPHK1
NUDT4	SLC46A1
NT5DC3	TMC8
NEMP1	ICAM2
MVK	PCYT2
STX2	MAFG
LINC02422	AFMID
SOHLH2	C17orf99
CENPIP1	PHLPP1
MYO16	SCRT2
PCID2	NFATC2
PPP2R5C	LSM14B
ZFYVE21	ID1
ATG14	SLC4A11
ESR2	CASS4
NR2F2	ANKRD27
TUBGCP4	GP6
PCLAF	LDLR
EPB42	P2RY11
TM2D3	DBP
NR2F2-AS1	FUT1
ZKSCAN2-DT	MEX3D
PDP2	ZNF296
LINC02193	PRR5
TMEM170A	PLA2G3
HBA2	IL2RB
AHSP	TOB2
NIP7	SEPTIN5
ZNF778	NEFH
LRRC37B	CSF2RB
ANKRD40	RUNX1
SH3GL1P1	CSTB
RENO1	UBASH3A
PLD6	LSS
SRSF1	MT-TP
ICAM2
PCYT2
GDPD1
TANC2
C18orf25
SNRPGP2
LPIN2
SS18L1
TUBB1
ANKRD27
CARD8-AS1
ZNF749
ZNF460
ERVK3-1
ZNF587B
ZNF587
ZNF417
FUT1
PRR5
PLA2G3
LINC01311
ADSL
XKR3
CSF2RB
DDX17
UBASH3A
LSS
MCM3AP-AS1
MT-TE
MT-TP
