# Supplementary material
Source: Research Square preprint supplement (doi:10.21203/rs.3.rs-9440495/v1)
Supplement: Supplementary file 1 [file 21c7579dad16cb4405f2a502.pdf]

**Supplementary Table 3. Adjusted p-values for comparisons shown in Figure 4D.**

| <b>Comparison</b>            | <b>Adjusted p value</b> |
|------------------------------|-------------------------|
| MONO NT vs MONO IM           | <0.0001 (****)          |
| MONO NT vs CO-C NT           | <0.0001 (****)          |
| MONO NT vs CO-C IM           | 0.5681 (ns)             |
| MONO NT vs CO-C IM+transwell | <0.0001 (****)          |
| MONO IM vs CO-C NT           | <0.0001 (****)          |
| MONO IM vs CO-C IM           | <0.0001 (****)          |
| MONO IM vs CO-C IM+transwell | 0.1066 (ns)             |
| CO-C NT vs CO-C IM           | <0.0001 (****)          |
| CO-C NT vs CO-C IM+transwell | <0.0001 (****)          |
| CO-C IM vs CO-C IM+transwell | <0.0001 (****)          |
