# Supplementary material
Source: Research Square preprint supplement (doi:10.21203/rs.3.rs-9440495/v1)
Supplement: Supplementary file 2 [file 28f7064538da3ce81c0843b6.pdf]

**Supplementary Table 1. Reagents used in this study.**

| <b>KEY REAGENTS</b>                    |                                                              |                |                   |
|----------------------------------------|--------------------------------------------------------------|----------------|-------------------|
|                                        | <b>REAGENT</b>                                               | <b>SOURCE</b>  | <b>IDENTIFIER</b> |
| <b>Antibodies<br/>(western blot)</b>   | Mouse monoclonal anti- $\alpha$ -Tubulin                     | Sigma-Aldrich  | #CP06             |
|                                        | Rabbit polyclonal anti-LaminB1                               | Abcam          | #ab16048          |
|                                        | Rabbit monoclonal anti-HIF-1 alpha                           | Abcam          | #ab179483         |
|                                        | Rabbit monoclonal anti-Erk1/2                                | Cell Signaling | #4695             |
|                                        | Rabbit monoclonal anti-p-Erk1/2<br>(Thr202/Tyr204)           | Cell Signaling | #4370             |
|                                        | Rabbit polyclonal anti-p-JNK<br>(Thr183/Tyr185)              | Cell Signaling | #9251             |
|                                        | Rabbit polyclonal anti I $\kappa$ B $\alpha$                 | Cell Signaling | #9242             |
|                                        | Mouse monoclonal anti-STAT3                                  | Cell Signaling | #9139             |
|                                        | Rabbit polyclonal anti-p-STAT3 (Tyr705)                      | Cell Signaling | #9131             |
|                                        | Rabbit polyclonal anti-CD44 (C-term)                         | Abcam          | #ab157107         |
|                                        | Rabbit polyclonal anti-CD44                                  | Proteintech    | #15675-1-AP       |
|                                        | Mouse monoclonal anti-GFP<br>(CoraLite® Plus 488-conjugated) | Proteintech    | #CL488-66002      |
| <b>Antibodies<br/>(flow cytometry)</b> | Anti-CD44-PE                                                 | Biolegend      | #103008           |
|                                        | Anti-CD44-APC                                                | Biolegend      | #103012           |
|                                        | Anti-P-RelA-PE                                               | BD Phosflow    | #558423           |
|                                        | Anti-P-cJun-AF647                                            | Biolegend      | #605555           |
|                                        | Anti-P-cFos-AF647                                            | Biolegend      | #631257           |
|                                        | Anti-CD34-PE                                                 | Invitrogen     | #CD34-581-04      |
|                                        | Anti-CD34-eFluor450                                          | Invitrogen     | #48-0349-42       |
|                                        | Anti-CD45-APC                                                | BD Pharmingen  | #555485           |
|                                        | Anti-CD45-Pacific Orange                                     | Invitrogen     | #MHCD4530         |
| <b>Cell<br/>lines</b>                  | K562                                                         | ATCC           | #CCL-243          |
|                                        | LAMA-84                                                      | DMSZ           | #ACC168           |
|                                        | HS-5                                                         | ATCC           | #CRL-11882        |
|                                        | HS-27A                                                       | ATCC           | #CRL-2946         |
| <b>Cell culture</b>                    | IMDM                                                         | Biowest        | #L0191            |
|                                        | RPMI                                                         | Biowest        | #L0490            |
|                                        | Opti-MEM Reduced Serum Medium                                | Gibco          | #11058021         |
|                                        | StemPro™-34 SFM (1X)                                         | Gibco          | #10639011         |
|                                        | IMDM no phenol red                                           | Gibco          | #21056023         |
|                                        | Penicillin-streptomycin solution (100X)                      | VWR            | #392-0406         |
|                                        | L-glutamine 100X, 200 mM                                     | Biowest        | #X0550            |
|                                        | Fetal Bovine Serum (FBS), heat<br>inactivated                | Gibco          | #10500064         |
|                                        | Trypsin                                                      | Biowest        | #L0932            |
|                                        | Recombinant Human GM-CSF                                     | Gibco          | #300-03           |
|                                        | Recombinant Human SCF                                        | Gibco          | #300-07           |
|                                        | Recombinant Human Flt3-Ligand                                | Gibco          | #300-19           |
|                                        | Recombinant Human IL-3                                       | Gibco          | #200-03           |
|                                        | Recombinant Human IL-6                                       | Gibco          | #200-06           |
| Recombinant Human TPO                  | Gibco                                                        | #300-18        |                   |

|                                                    |                                                                             |                       |                           |                      |                   |
|----------------------------------------------------|-----------------------------------------------------------------------------|-----------------------|---------------------------|----------------------|-------------------|
| <b>Dyes and probes</b>                             | DiD Vybrant™ DiD Cell-Labeling Solution                                     | Invitrogen            | #V22887                   |                      |                   |
|                                                    | CMFDA Green                                                                 | MedChemExpress        | #HY126561                 |                      |                   |
|                                                    | Cell Proliferation Dye eFluor™ 450                                          | Invitrogen            | #65-0842-90               |                      |                   |
|                                                    | eBioscience Fixable Viability Dye eFluor 455UV                              | Invitrogen            | #65-0868-14               |                      |                   |
|                                                    | LIVE/DEAD Fixable Near-IR Dead Cell Stain Kit, for 633 or 635 nm excitation | Invitrogen            | #L34976                   |                      |                   |
|                                                    | 7-AAD                                                                       | BD Pharmingen         | #559925                   |                      |                   |
|                                                    | FITC Annexin V                                                              | BD Pharmingen         | #556419                   |                      |                   |
|                                                    | PE Annexin V                                                                | BD Pharmingen         | #556421                   |                      |                   |
|                                                    | Annexin V Binding Buffer 10X                                                | BD Pharmingen         | #556454                   |                      |                   |
|                                                    | Propidium iodide (PI)                                                       | Sigma-Aldrich         | #P4170                    |                      |                   |
|                                                    | Wheat Germ Agglutinin (WGA) AF488                                           | Invitrogen            | #W11261                   |                      |                   |
| Wheat Germ Agglutinin (WGA) AF647                  | Invitrogen                                                                  | #W32466               |                           |                      |                   |
| <b>Other reagents</b>                              | Corning® Matrigel® Basement Membrane Matrix                                 | Corning               | #356234                   |                      |                   |
|                                                    | MethoCult™ H4434 Classic                                                    | Stemcell Technologies | #04434                    |                      |                   |
|                                                    | MethoCult™ H4230                                                            | Stemcell Technologies | #04230                    |                      |                   |
|                                                    | Corning® Fluoroblok™ Inserts with 8 µm pore size                            | Corning               | #351152                   |                      |                   |
|                                                    | ThinCert Tissue Culture Inserts with 1 µm pore size                         | Greiner Bio-One       | #665610                   |                      |                   |
|                                                    | EasySep™ Human CD34 Positive Selection Kit II                               | Stemcell Technologies | #17856                    |                      |                   |
|                                                    | Lab-Tek Chambered Coverglass                                                | Thermo Scientific     | #155411PK                 |                      |                   |
|                                                    | Collagen I, rat tail                                                        | Gibco                 | #A1048301                 |                      |                   |
|                                                    | Coomassie Brilliant Blue R-250                                              | Sigma-Aldrich         | #1125530025               |                      |                   |
|                                                    | Paraformaldehyde 16%                                                        | Thermo Scientific     | #043368.9M                |                      |                   |
|                                                    | Triton X-100                                                                | Sigma                 | #10789704001              |                      |                   |
| <b>shRNAs</b>                                      |                                                                             |                       |                           |                      |                   |
| <b>Target</b>                                      | <b>Clone</b>                                                                | <b>TRC number</b>     | <b>Source</b>             | <b>Target region</b> | <b>Identifier</b> |
| <b>Non-targeting</b>                               | -                                                                           | -                     | Sigma-Aldrich             | -                    | #SHC202V          |
| <b>CD44</b>                                        | 1                                                                           | TRCN0000057567        |                           | CDS                  | #SHCLNV           |
|                                                    | 2                                                                           | TRCN0000289308        |                           | CDS                  |                   |
|                                                    | 3                                                                           | TRCN0000289233        |                           | CDS                  |                   |
|                                                    | 4                                                                           | TRCN0000296191        |                           | CDS                  |                   |
|                                                    | 5                                                                           | TRCN0000308110        |                           | 3'UTR                |                   |
| <b>Quantitative real-time PCR primer sequences</b> |                                                                             |                       |                           |                      |                   |
| <b>Target</b>                                      | <b>Forward primer</b>                                                       |                       | <b>Reverse primer</b>     |                      |                   |
| CD44S                                              | 5'TCGACTGTTGACTGCAATGC                                                      |                       | 5'AAGGTGGAGCAAACACAACC    |                      |                   |
| β-actin                                            | 5'GTGAAGGTGACAGCAGTCGGTT                                                    |                       | 5'GAAGTGGGGTGGCTTTTAGGAT  |                      |                   |
| 18S rRNA                                           | 5'GCGCGCTAGAGGTGAAATTC                                                      |                       | 5'TTGGCAAATGCTTTCGCTC     |                      |                   |
| MMP2                                               | 5'TGGCAAGTACGGCTTCTGTC                                                      |                       | 5'TTCTTGTCGCGGTCGTAGTC    |                      |                   |
| MMP3                                               | 5'CAGTTTGCTCAGCCTATCCA                                                      |                       | 5'TCACATCTTTTCGAGGTCGT    |                      |                   |
| MMP9                                               | 5'GGGACGCAGACATCGTCATC                                                      |                       | 5'TCGTCATCGTCGAAATGGGC    |                      |                   |
| SERPINE1                                           | 5'ACCGCAACGTGGTTTTCTCA                                                      |                       | 5'TTGAATCCCATAGCTGCTTGAAT |                      |                   |
| ITGB2                                              | 5'TTCGGGTCCTTCGTGGACA                                                       |                       | 5'ACTGGTTGGAGTTGTTGGTCA   |                      |                   |
