# Supplementary material
Source: Research Square preprint supplement (doi:10.21203/rs.3.rs-9440495/v1)
Supplement: Supplementary file 5 [file cf4b5c519a47fef96d0cbf89.pdf]

**Supplementary Table 2. Clinical characteristic of CML patients' samples.**

| <b>ID</b>   | <b>Age</b> | <b>Sex</b> | <b>CML stage</b> | <b>Identified mutations (NGS)</b>           | <b>% of blasts in the blood</b> |
|-------------|------------|------------|------------------|---------------------------------------------|---------------------------------|
| <b>P181</b> | 55         | M          | CML-CP           | Primarily resistance<br>ABL1 E255K mutation | 1%                              |
| <b>P371</b> | 30         | M          | CML-CP           | No NGS diagnostics                          | 8% IG<br>(immature cells)       |
| <b>P372</b> | 51         | F          | CML-CP           | No NGS diagnostics                          | 81G/L<br>leukocytosis           |
| <b>P356</b> | 52         | F          | CML-BC           | MSH2 and WT1 mutations                      | 27%                             |
